# Supplementary material for: ESTIMation of the ABiLity of prophylactic central compartment neck dissection to modify outcomes in low-risk differentiated thyroid cancer: a prospective randomized trial
Source: Springer Nature journal article supplement (doi:10.1186/s13063-023-07294-0), 2023-04-28
Supplement: MOESM9 [file 25296772]

**Ethics Committee**

**Paris Region (Ile de France)**

President: Marie-France MAMZER-BRUNEEL

Vice-president: Jean-Bernard CHARPENTIER

Secretaires: Pierre COLONNA, Jean-Louis BRESSON, Stéphane DONNADIEU

Members: C. ARDIOT, C. BADOUAL, C. BALLOUARD, M.-C. BARET, J.-L. BRESSON, C. BROISSAND, J.-B. CHARPENTIER, B. DEBAECKER, M. DE FALLOIS, N. LALLMAHAMOOD, M.-F. MAMZER-BRUNEL, P. VAN ES

Secretary: Nora VESTRIS

Dr Camille JANIN  
DRC  
114, rue Edouard Vaillant  
94805 Villejuif

Paris, February 13, 2018

**Research project number 2017-11-03**

**ID-RCB/EUDRACT : 2017-A01779-44**

The research project entitled « Estimation of the AbiLity of prophylactic central compartment neck dissection to modify outcomes in low-risk differentiated thyroid cancer, » presented by Camille JANIN, was evaluated by the ethics committee on September 14th, 2017.

Insurance: SHAM, Contract number 124895

Investigator in France: Dr Dana Hartl, Gustave Roussy Hospital

Promotor: Institut Gustave Roussy

The information relative to this trial was examined during the meeting held on **February 5th, 2018**, based on the following elements:

The administrative file containing:

The request letter, dated and signed

The request form, dated and signed

The additional document requested by the ethics committee, dated and signed

The file concerning the research containing:

The research protocol dated and signed, version 1.0 dated September 13th, 2017

The summary of the French version of the protocol version 1.0 dated September 13th, 2017

The patient information document and the patient consent form version 1.0 dated September 13th, 2017

A copy of the certificate of insurance

Research project number 2017-11-03

ID-RCB/EUDRACT : 2017-A01779-44

The justification of the adequateness of the human, material and technical means,  
version 1.0 dated September 13th, 2017

The list of principal investigators version 1.0 dated September 13th, 2017 and  
January 24th, 2018

The curriculum vitae of the principal investigators in each center

The response to our remarks made on November 14th, 2017

The list of the principal investigators version 1.5 dated november 28th 2017 and their  
corresponding curriculum vitae

The patient information document and the patient consent form version 1.1 dated  
November 14th, 2017

The response to our remarks made on December 7th, 2017

The patient information document and the patient consent form version 1.2 dated January  
5th, 2018

Those who participated in the deliberation (identity and quality of members, category): list on the  
last page.

After having verified that the research was conform with the article of the Public Health Code L-1121-  
1 and L-1123-7 defining the conditions for validity of research implicating the human person category  
1°, the Comity adopts the following deliberation :

#### **FAVORABLE OPINION**

Pr Marie-France MAMZER-BRUNEEL  
President of the Ethics Committee  
Paris Region (Ile de France 2)

(STAMP)  
Ethics Committee  
Paris Region (Ile de France 2)  
149, rue de Sèvres  
75743 Paris cedex 15  
Phone : 01 42 19 26 88  
Fax : 01 44 49 45 06

**PARIS REGION (ILE DE FRANCE 2)**

President: M.-F. MAMZER-BRUNEEL

Vice-president: J-B CHARPENTIER

Secretaires: P. COLONNA

J-L BRESSON

S. DONNADIEU

**MEETING ON FEBRUARY 5TH 2018****PERSONS QUALIFIED CONCERNING BIOMEDICAL RESEARCH:**

|                                 |         |                          |
|---------------------------------|---------|--------------------------|
| -Dr MAMZER-BRUNEEL Marie-France | Present | Full member              |
| -Dr DONNADIEU Stéphane          | Present | Full member              |
| -Pr COLONNA Pierre              | Present | Full member              |
| -Pr BRESSON Jean-Louis*         | Present | Full member (pediatrics) |
| -Pr BADOUAL Cécile              | Excused | Alternate member         |
| -Dr JANNOT Anne-Sophie          | Present | Alternate member         |
| -vacant position                |         |                          |
| -vacant position                |         |                          |

**GENERAL PRACTITIONERS:**

|                     |         |             |
|---------------------|---------|-------------|
| -Dr VAN ES Philippe | Present | Full member |
| -vacant position    |         |             |

**PHARMACISTS:**

|                          |         |                  |
|--------------------------|---------|------------------|
| -Mrs BEAUSSIER Hélène    | Excused | Full member      |
| -Mrs BROISSAND Christine | Present | Alternate member |

**NURSES:**

|                            |         |             |
|----------------------------|---------|-------------|
| -Mrs BARET Marie-Christine | Excused | Full member |
| -vacant position           |         |             |

**PERSONS QUALIFIED IN ETHICS:**

-vacant position  
-vacant position

**PSYCHOLOGISTS:**

|                         |         |                  |
|-------------------------|---------|------------------|
| -Mr BALLOUARD Christian | Present | Full member      |
| -Mr LALLMAHAMOOD Nizaar | Excused | Alternate member |

**PERSONS QUALIFIED IN THE SOCIAL DOMAIN:**

-vacant position  
-vacant position

**PERSONS QUALIFIED IN THE JUDICIAL DOMAIN:**

|                       |         |                  |
|-----------------------|---------|------------------|
| -Mrs de FALLOIS Manon | Present | Full member      |
| -Mr MARTINET Eric     | Excused | Alternate member |
| -2 vacant positions   |         |                  |

Research project number 2017-11-03

ID-RCB/EUDRACT : 2017-A01779-44

**ACCREDITED ASSOCIATIONS OF PATIENTS OR CLIENTS OF THE HEALTH SYSTEM:**

|                              |         |                  |
|------------------------------|---------|------------------|
| -Mrs ARDIOT Chantal          | Present | Full member      |
| -Mr CHARPENTIER Jean-Bernard | Present | Full member      |
| -Mrs DEBAECKER Blanche       | Excused | Alternate member |
| -Mrs DELSARTE Nicole         | Present | Alternate member |

\*(competents in the domain of biostatistics and epidemiology)
